# Supplementary material
Source: PubMed Central journal article supplement (PMC4111677)
Supplement: cc-13-2221-s01.pdf [file cc-13-2221-s01.pdf]

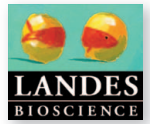

## **Supplemental Material to:**

**Latif Rachdi, Dulanjalee Kariawasam, Virginie Aiello,  
Yann Herault, Nathalie Janel, Jean-Maurice Delabar,  
Michel Polak, and Raphaël Scharfmann**

**Dyrk1A induces pancreatic  $\beta$  cell mass expansion and  
improves glucose tolerance**

**Cell Cycle 2014; 13(14)**

**<http://dx.doi.org/10.4161/cc.29250>**

**<http://www.landesbioscience.com/journals/cc/article/29250>**

## Figure S1

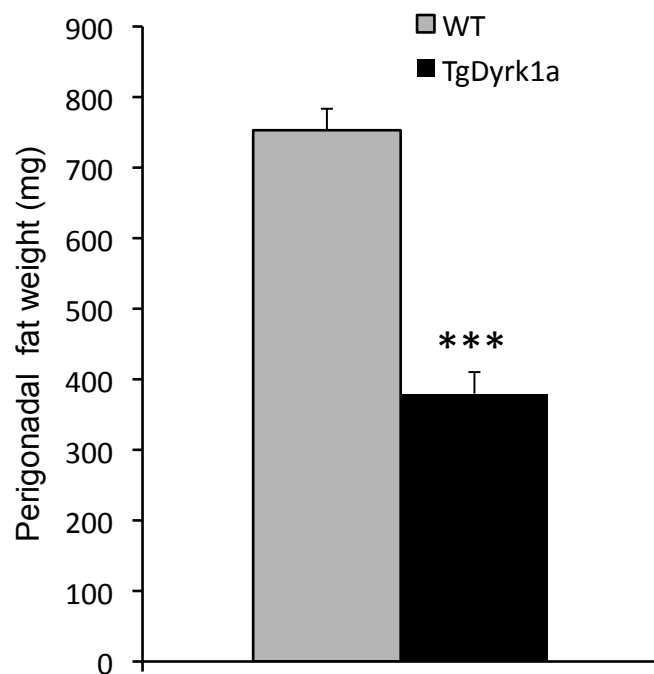

### Figure S1: Fat mass in aged *mBACTgDyrk1A* mouse

Perigonadal fat mass in wild type and *mBACTgDyrk1A* male mice of 24 weeks. Data are shown as the mean  $\pm$  SEM of at least three independent experiments, \*\*\*P < 0.01.

Figure S2

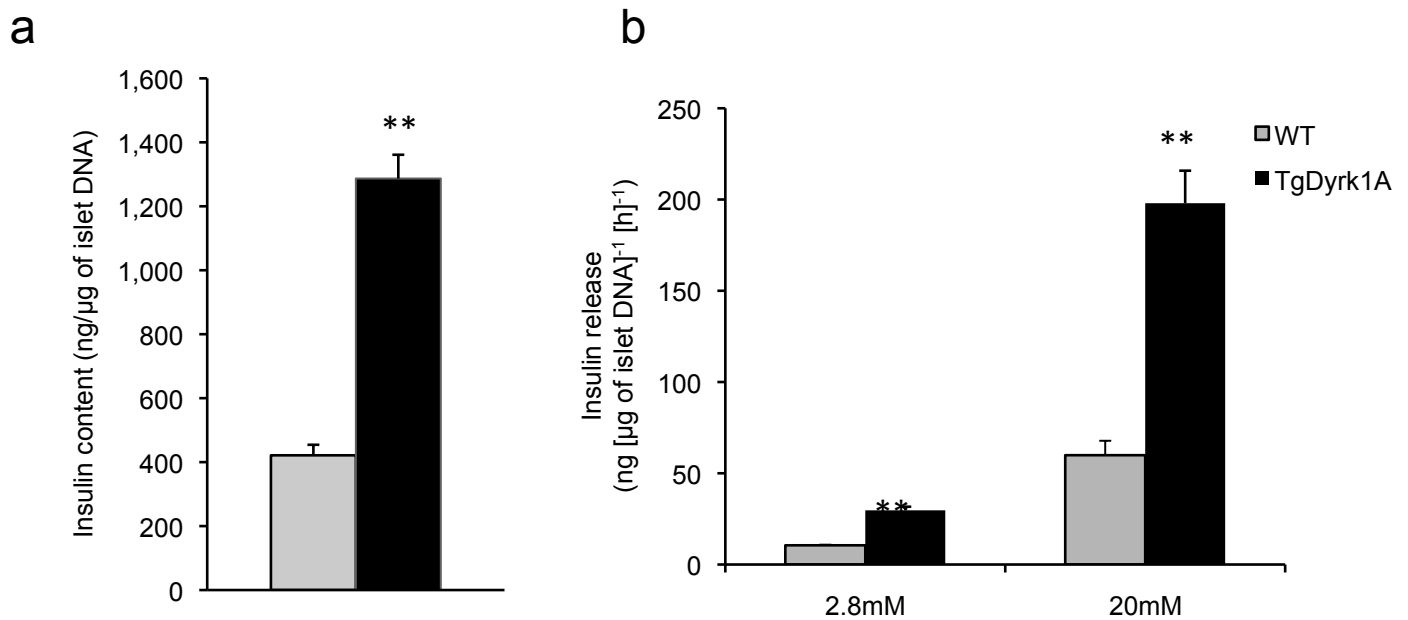

**Figure S2: Insulin content and secretion in *mBACTgDyrk1A* mouse islets.** (a–b) Insulin content and glucose-induced insulin secretion and insulin content in isolated islets from 12-week-old *mBACTgDyrk1A* and wild-type mice presented as ng per μg of islet DNA per hour. Data are shown as mean ± SEM of at least three independent experiments. \*\*p<0.01.

Figure S3

a

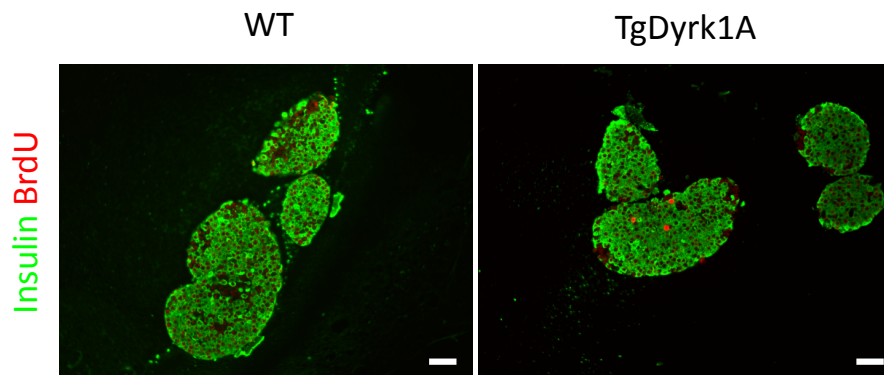

b

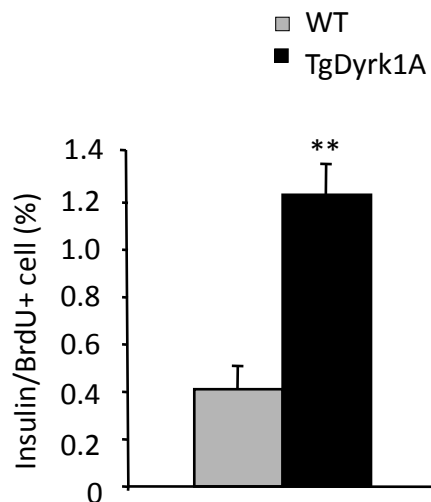

**Figure S3: Proliferation in isolated islet from *mBACTgDyrk1A* mice**

(a) BrdU and Insulin staining on islet from 24 weeks *mBACTgDyrk1A* and wild-type mice. Scale bar: 25 $\mu$ m. (b) Proliferative index was established by measurement of at least 2,000 beta cells. Data are mean  $\pm$  SEM from at least three pancreata per condition. \*\*P < 0.01.
